# Supplementary material for: A gratuitous β-Lactamase inducer uncovers hidden active site dynamics of the Staphylococcus aureus BlaR1 sensor domain
Source: PubMed Central journal article supplement (PMC5957439; doi:10.1371/journal.pone.0197241), 2018-05-17
Supplement: pone.0197241.s006.pdf [file pone.0197241.s006.pdf]

**S1 Table. Resonance assignments of CBAP-acylated BlaR<sup>S</sup>**

| <b>Residue</b> | <b>1HN</b> | <b>15N</b> | <b>13CO</b> | <b>13CA</b> | <b>13CB</b> |
|----------------|------------|------------|-------------|-------------|-------------|
| --             | --         | --         | 174.751     | 57.724      | 62.792      |
| <b>334</b>     | 8.176      | 123.334    | 176.706     | 61.003      | 37.23       |
| <b>335</b>     | 7.956      | 117.319    | 174.137     | 61.361      | 68.903      |
| <b>336</b>     | 7.839      | 122.104    | 176.364     | 53.55       | 40.36       |
| <b>337</b>     | 7.714      | 120.054    | 175.308     | 57.247      | 37.156      |
| <b>338</b>     | 7.912      | 118.344    | 173.238     | 51.941      | 39.987      |
| <b>339</b>     | 8.934      | 121.659    | 176.464     | 56.383      | 38.199      |
| <b>347</b>     | 7.648      | 118.762    | 173.566     | 55.041      | 39.838      |
| <b>348</b>     | 8.675      | 122.172    | 174.608     | 53.61       | 30.821      |
| <b>349</b>     | 8.734      | 128.598    | 176.45      | 59.661      | 35.963      |
| <b>350</b>     | 8.851      | 127.914    | 176.135     | 52.269      | 45.651      |
| <b>353</b>     | 9.013      | 120.053    | 174.737     | 57.008      | 64.133      |
| <b>354</b>     | 8.631      | 122.719    | 178.962     | 58.886      | 30.597      |
| <b>355</b>     | 7.179      | 119.164    | 177.363     | 63.089      | 36.932      |
| <b>356</b>     | 7.531      | 119.574    | 178.034     | 61.361      | 37.677      |
| <b>357</b>     | 7.736      | 106.654    | 175.336     | 46.516      | --          |
| <b>358</b>     | 8.792      | 122.445    | --          | 58.26       | 62.121      |
| <b>359</b>     | 8.118      | 119.848    | 173.68      | 52.507      | 39.689      |
| <b>360</b>     | 7.678      | 115.61     | 173.652     | 56.651      | 63.835      |
| <b>360_2</b>   | 7.759      | 115.582    | --          | --          | --          |
| <b>361</b>     | 7.883      | 111.371    | 170.355     | 45.621      | 2.826       |
| <b>362</b>     | 9.057      | 111.645    | 172.738     | 56.651      | 66.891      |
| <b>362_2</b>   | 8.976      | 111.541    | --          | --          | --          |
| <b>363</b>     | 8.264      | 120.805    | --          | --          | 43.341      |
| <b>365</b>     | 9.233      | 124.77     | 173.081     | 53.491      | 37.752      |
| <b>366</b>     | 9.819      | 126.274    | 174.965     | 55.816      | 42.149      |
| <b>367</b>     | 7.634      | 120.805    | 174.665     | 55.369      | 63.612      |
| <b>368</b>     | 8.118      | 126.479    | 179.889     | 56.531      | 30.001      |
| <b>369</b>     | 9.951      | 121.899    | 179.304     | 58.529      | 30.448      |
| <b>370</b>     | 7.986      | 115.131    | 176.007     | 55.488      | 31.566      |
| <b>371</b>     | 7.531      | 121.078    | 173.795     | 53.491      | 38.05       |
| <b>373</b>     | 8.382      | 122.24     | --          | 57.277      | 40.584      |
| <b>374</b>     | 9.629      | 121.01     | 175.779     | 55.816      | 39.019      |
| <b>375</b>     | 8.895      | 120.942    | 175.122     | 60.585      | 42.223      |
| <b>376</b>     | 9.752      | 128.784    | 174.009     | 55.101      | 39.391      |
| <b>377</b>     | 8.822      | 126.274    | 173.78      | 51.702      | 33.951      |
| <b>378</b>     | 8.837      | 124.36     | 179.447     | 59.363      | 27.393      |
| <b>379</b>     | 8.616      | 119.711    | 180.104     | 59.661      | 30.523      |
| <b>380</b>     | 7.032      | 120.053    | 179.732     | 58.26       | 28.213      |
| <b>381</b>     | 8.602      | 117.865    | --          | 61.599      | --          |
| <b>382</b>     | 6.856      | 119.574    | 175.936     | 56.591      | 29.927      |
| <b>383</b>     | 7.34       | 123.129    | 2.826       | 56.204      | 31.417      |
| <b>384</b>     | 8.054      | 121.528    | 174.351     | --          | 29.778      |
| <b>385</b>     | 8.142      | 120.276    | 175.322     | 56.144      | 42.745      |

|              |       |         |         |        |        |
|--------------|-------|---------|---------|--------|--------|
| <b>386</b>   | 9.585 | 117.934 | 176.621 | 2.826  | 63.537 |
| <b>386_2</b> | 9.639 | 117.596 | --      | --     | --     |
| <b>399</b>   | 8.675 | 107.27  | 175.95  | 46.963 | --     |
| <b>400</b>   | 8.382 | 124.36  | 181.588 | 56.71  | 40.36  |
| <b>401</b>   | 9.071 | 123.744 | 177.42  | 57.485 | 41.925 |
| <b>402</b>   | 7.824 | 111.85  | 175.408 | 54.653 | 28.362 |
| <b>403</b>   | 7.531 | 113.627 | 174.865 | 56.83  | 25.232 |
| <b>404</b>   | 8.426 | 120.842 | 176.592 | 63.596 | 37.752 |
| <b>405</b>   | 6.724 | 109.731 | 173.909 | 58.529 | 40.807 |
| <b>406</b>   | 7.604 | 117.045 | 174.066 | 52.656 | 38.944 |
| <b>407</b>   | 8.396 | 117.66  | 176.849 | 55.667 | 39.168 |
| <b>408</b>   | 8.08  | 119.602 | 176.692 | 57.038 | 28.883 |
| <b>409</b>   | 7.854 | 116.84  | 174.451 | 52.895 | 38.348 |
| <b>410</b>   | 9.056 | 122.581 | --      | 56.68  | 62.047 |
| <b>411</b>   | 8     | 124.428 | 177.334 | 55.995 | 30.076 |
| <b>412</b>   | 8.954 | 121.352 | 175.251 | 55.22  | 36.783 |
| <b>413</b>   | 8.587 | 118.481 | 173.481 | 58.171 | 63.015 |
| <b>414</b>   | 8.631 | 124.018 | 175.336 | 55.16  | 27.617 |
| <b>415</b>   | 6.871 | 127.231 | --      | 52.06  | 36.261 |
| <b>422</b>   | 8.609 | 126.093 | --      | 57.366 | 39.689 |
| <b>422_2</b> | 8.523 | 125.925 | --      | --     | --     |
| <b>423</b>   | 8.734 | 118.754 | 177.991 | 53.312 | 16.885 |
| <b>424</b>   | 8.088 | 116.567 | 177.277 | 56.353 | 28.809 |
| <b>424_2</b> | 8.05  | 116.547 | --      | --     | --     |
| <b>425</b>   | 7.274 | 123.089 | 173.195 | 51.494 | 35.963 |
| <b>426</b>   | 7.003 | 111.986 | 174.937 | 54.952 | 32.312 |
| <b>426_2</b> | 6.944 | 111.929 | --      | --     | --     |
| <b>427</b>   | 8.47  | 120.258 | 174.537 | 56.71  | 28.958 |
| <b>428</b>   | 7.956 | 116.703 | 175.293 | 52.269 | 31.268 |
| <b>429</b>   | 7.893 | 120.531 | 174.708 | 52.06  | 41.329 |
| <b>430</b>   | 7.956 | 117.865 | 177.763 | 58.38  | 39.019 |
| <b>430_2</b> | 8.03  | 117.956 | --      | --     | --     |
| <b>431</b>   | 7.355 | 114.447 | 178.605 | 56.293 | 36.559 |
| <b>432</b>   | 8.587 | 114.106 | 177.791 | 65.266 | 67.636 |
| <b>433</b>   | 8.558 | 125.916 | 180.532 | 53.461 | 16.96  |
| <b>433_2</b> | 8.592 | 125.951 | --      | --     | --     |
| <b>434</b>   | 8.212 | 118.293 | 179.304 | 57.157 | 31.492 |
| <b>434_2</b> | 8.243 | 118.259 | --      | --     | --     |
| <b>435</b>   | 8.176 | 118.344 | 177.477 | 58.499 | 27.617 |
| <b>436</b>   | 7.634 | 111.44  | 172.767 | 52.358 | 38.05  |
| <b>437</b>   | 7.414 | 122.377 | 171.411 | 58.26  | 61.376 |
| <b>438</b>   | 8.442 | 117.897 | 176.535 | 60.943 | 27.766 |
| <b>438_2</b> | 8.353 | 118.079 | --      | --     | --     |
| <b>445</b>   | 6.842 | 117.524 | 177.177 | 65.474 | 36.634 |
| <b>445_2</b> | 6.77  | 117.323 | --      | --     | --     |
| <b>446</b>   | 7.795 | 112.533 | 177.377 | 61.211 | 62.419 |
| <b>447</b>   | 8.03  | 115.678 | 177.563 | 56.054 | 40.36  |
| <b>447_2</b> | 7.945 | 115.486 | --      | --     | --     |

|       |       |         |         |        |        |
|-------|-------|---------|---------|--------|--------|
| 448   | 7.502 | 115.473 | 175.707 | 55.011 | 30.001 |
| 449   | 7.852 | 123.306 | 175.251 | 58.499 | 37.603 |
| 451   | 8.704 | 125.863 | 177.292 | 59.81  | 31.045 |
| 452   | 8.514 | 113.901 | 178.077 | 55.727 | 36.41  |
| 453   | 6.959 | 122.172 | 176.592 | 60.526 | 35.889 |
| 454   | 7.59  | 120.19  | --      | 66.249 | --     |
| 455   | 8.587 | 122.735 | 180.732 | 54.952 | 16.885 |
| 456   | 7.384 | 116.498 | 176.335 | 66.249 | 67.636 |
| 457   | 7.868 | 120.285 | 178.89  | 57.366 | 26.871 |
| 458   | 8.822 | 116.772 | 179.59  | 58.052 | 38.05  |
| 459   | 7.384 | 118.754 | 179.318 | 59.065 | 30.821 |
| 460   | 7.908 | 120.483 | 178.548 | 58.409 | --     |
| 461   | 8.475 | 116.634 | 178.219 | 54.832 | 42     |
| 462   | 7.472 | 116.43  | 174.737 | 53.103 | 35.814 |
| 463   | 8.088 | 118.753 | 173.495 | 58.558 | 37.23  |
| 464   | 6.504 | 113.285 | 173.88  | 45.413 | --     |
| 465   | 8.519 | 119.998 | 175.707 | 52.09  | 36.783 |
| 465_2 | 8.603 | 120.344 | --      | --     | --     |
| 466   | 8.22  | 113.08  | 173.424 | 58.052 | 27.989 |
| 467   | 7.003 | 117.045 | 175.436 | 52.388 | 38.348 |
| 468   | 8.455 | 125.658 | 176.792 | 53.819 | 40.807 |
| 468_2 | 8.392 | 125.383 | --      | --     | --     |
| 469   | 7.78  | 106.313 | 175.75  | 46.724 | --     |
| 470   | 9.101 | 123.145 | 174.408 | 58.081 | 62.568 |
| 471   | 9.392 | 123.676 | 174.722 | 59.125 | 37.528 |
| 472   | 7.835 | 120.779 | 2.826   | 54.385 | 29.852 |
| 475   | 6.446 | 121.078 | 172.524 | 57.724 | 28.362 |
| 475_2 | 6.492 | 121.54  | --      | --     | --     |
| 476   | 6.519 | 120.736 | --      | 52.284 | --     |
| 476_2 | 6.506 | 120.731 | --      | --     | --     |
| 478   | 8.153 | 121.949 | 176.15  | 53.491 | 42.596 |
| 479   | 9.002 | 122.424 | 175.836 | 60.943 | 62.121 |
| 480   | 7.135 | 126.137 | 176.721 | 55.369 | 43.117 |
| 481   | 8.176 | 122.24  | 173.181 | 54.385 | 37.752 |
| 482   | 9.731 | 120.668 | 171.639 | 61.152 | 39.987 |
| 482_2 | 9.603 | 120.649 | --      | --     | --     |
| 483   | 7.659 | 123.833 | 174.865 | 57.724 | 65.475 |
| 484   | 9.658 | 122.924 | 177.42  | 57.217 | 38.87  |
| 485   | 8.878 | 117.798 | 178.376 | 58.171 | 40.509 |
| 486   | 7.208 | 114.584 | 177.078 | 58.499 | 30.15  |
| 487   | 8.191 | 116.361 | 179.19  | 59.81  | 25.828 |
| 488   | 6.68  | 116.567 | 175.336 | 66.13  | 30.896 |
| 489   | 7.24  | 118.998 | 177.848 | 65.862 | 38.87  |
| 490   | 8.939 | 116.567 | 178.662 | 65.266 | 30.597 |
| 491   | 6.9   | 120.531 | 177.363 | 57.277 | 37.603 |
| 495   | 7.722 | 112.283 | 180.432 | 55.816 | 30.97  |
| 496   | 8.484 | 116.156 | 178.219 | 56.054 | 28.511 |
| 497   | 7.466 | 116.599 | 175.593 | 55.279 | --     |

|       |       |         |         |        |        |
|-------|-------|---------|---------|--------|--------|
| 505   | 7.907 | 124.786 | 179.19  | 54.713 | 17.109 |
| 506   | 7.898 | 117.182 | 178.548 | 60.168 | 31.417 |
| 507   | 8.264 | 117.455 | 177.834 | 55.488 | 37.156 |
| 508   | 7.883 | 123.041 | 179.219 | 58.588 | 26.871 |
| 509   | 8.294 | 121.762 | 180.318 | 57.366 | 39.987 |
| 510   | 8.616 | 116.567 | 175.936 | 62.821 | 61.525 |
| 511   | 7.88  | 114.653 | 176.264 | 61.897 | --     |
| 512   | 7.471 | 117.875 | 173.952 | 60.943 | 63.313 |
| 513   | 7.282 | 120.6   | 176.107 | 53.61  | 43.192 |
| 514   | 6.812 | 121.147 | 176.664 | 56.83  | 39.466 |
| 515   | 9.115 | 129.555 | 176.535 | 61.48  | 38.348 |
| 516   | 7.384 | 115.815 | 172.553 | 54.952 | 34.473 |
| 517   | 8.367 | 121.215 | 173.823 | 54.415 | 34.696 |
| 518   | 8.344 | 122.771 | 174.109 | 51.613 | 38.124 |
| 519   | 8.822 | 117.934 | 176.764 | 58.38  | 27.766 |
| 520   | 8.466 | 117.589 | 176.535 | 55.935 | 32.982 |
| 521   | 7.458 | 115.336 | 172.239 | 56.382 | 39.242 |
| 522   | 8.308 | 115.883 | 173.895 | 54.355 | 33.057 |
| 523   | 8.91  | 125.932 | 172.553 | 54.206 | 44.459 |
| 524   | 8.998 | 127.914 | 175.579 | 55.101 | 39.689 |
| 525   | 8.778 | 106.039 | 169.741 | 47.112 | --     |
| 526   | 8.308 | 117.182 | --      | 52.269 | 34.994 |
| 527   | 7.956 | 115.815 | 177.691 | 60.794 | 69.946 |
| 527_2 | 7.839 | 116.02  | 177.22  | 60.585 | 69.946 |
| 528   | 8.382 | 105.697 | 171.782 | 47.112 | 2.826  |
| 528_2 | 8.235 | 105.834 | 172.439 | 47.41  | 2.826  |
| 529   | 7.988 | 118.627 | 171.582 | 63.089 | 72.629 |
| 529_2 | 7.898 | 118.845 | --      | 63.477 | 72.778 |
| 530   | 8.646 | 113.559 | 172.11  | 43.624 | --     |
| 530_2 | 7.722 | 112.283 | --      | 43.177 | --     |
| 531   | --    | --      | 175.251 | 60.228 | 39.317 |
| 531_2 | --    | --      | 173.638 | 59.244 | 40.956 |
| 532   | 8.426 | 126.615 | 176.35  | 61.092 | 33.877 |
| 532_2 | 8.01  | 123.162 | 176.364 | 61.361 | 34.1   |
| 533   | 9.629 | 128.735 | 175.493 | 53.729 | 36.41  |
| 533_2 | 9.555 | 128.529 | 175.45  | 53.64  | 36.559 |
| 534   | 8.382 | 102.895 | 173.181 | 44.846 | --     |
| 534_2 | 8.147 | 102.553 | 173.067 | 45.055 | --     |
| 535   | 7.458 | 121.283 | 175.636 | 53.64  | 33.504 |
| 535_2 | 7.531 | 121.694 | 175.507 | 53.819 | 33.504 |
| 536   | 8.323 | 124.77  | 176.892 | 57.873 | 35.889 |
| 536_2 | 8.543 | 125.522 | 176.421 | 58.171 | 36.187 |
| 547   | 8.778 | 119.711 | 173.78  | 59.244 | 70.542 |
| 548   | 8.822 | 115.473 | 175.507 | 54.713 | 37.23  |
| 548_2 | 8.905 | 115.362 | --      | --     | --     |
| 550   | 7.678 | 119.369 | 172.638 | 52.06  | 42.074 |
| 551   | 9.585 | 123.402 | 173.309 | 55.041 | 34.845 |
| 555   | 8.807 | 119.164 | --      | 52.299 | 22.847 |

|              |       |         |         |        |        |
|--------------|-------|---------|---------|--------|--------|
| <b>556</b>   | 9.534 | 122.502 | --      | 61.539 | 70.095 |
| <b>556_2</b> | 9.466 | 122.476 | --      | --     | --     |
| <b>557</b>   | 8.588 | 123.711 | 172.738 | 54.504 | 30.448 |
| <b>558</b>   | 8.206 | 123.881 | 174.266 | 52.567 | 44.682 |
| <b>559</b>   | 8.646 | 114.789 | 173.581 | 56.263 | 64.655 |
| <b>559_2</b> | 8.616 | 114.843 | --      | --     | --     |
| <b>560</b>   | 7.414 | 118.822 | 174.537 | 53.074 | 43.043 |
| <b>561</b>   | 8.822 | 111.371 | 173.138 | 45.949 | --     |
| <b>562</b>   | 8.338 | 127.026 | 173.623 | 52.954 | 30.97  |
| <b>564</b>   | 7.413 | 115.815 | 174.594 | 54.952 | 65.027 |
| <b>565</b>   | 9.189 | 114.037 | 175.579 | 47.738 | --     |
| <b>565_2</b> | 9.275 | 114.474 | --      | --     | --     |
| <b>565_3</b> | 9.376 | 114.421 | --      | --     | --     |
| <b>566</b>   | 8.074 | 121.42  | 178.99  | 57.724 | 29.778 |
| <b>567</b>   | 7.706 | 118.287 | --      | 54.385 | 36.41  |
| <b>567_2</b> | 7.638 | 118.501 | --      | --     | --     |
| <b>568</b>   | 8.181 | 123.031 | 180.632 | 54.683 | 15.991 |
| <b>568_2</b> | 8.083 | 122.884 | --      | --     | --     |
| <b>569</b>   | 8.689 | 127.096 | --      | 59.333 | 27.393 |
| <b>569_2</b> | 8.634 | 127.093 | --      | --     | --     |
| <b>569_3</b> | 8.554 | 127.024 | --      | --     | --     |
| <b>577</b>   | 7.927 | 119.506 | 180.175 | 58.678 | 31.194 |
| <b>578</b>   | 7.707 | 123.129 | 178.391 | 59.125 | 27.766 |
| <b>579</b>   | 7.875 | 114.766 | 176.264 | 55.935 | 32.237 |
| <b>580</b>   | 7.384 | 106.928 | 174.565 | 45.055 | --     |
| <b>583</b>   | 7.15  | 117.592 | 175.308 | 52.597 | 38.87  |
| <b>584</b>   | 8.162 | 108.842 | 173.167 | 45.025 | --     |
