# Supplementary material for: A gratuitous β-Lactamase inducer uncovers hidden active site dynamics of the Staphylococcus aureus BlaR1 sensor domain
Source: PubMed Central journal article supplement (PMC5957439; doi:10.1371/journal.pone.0197241), 2018-05-17
Supplement: pone.0197241.s007.pdf [file pone.0197241.s007.pdf]

**S2 Table. EXSY exchange rates for select  $\beta 5/\beta 6$  residues**

|             | <b><math>k_{ab}</math> (<math>s^{-1}</math>)</b> | <b>StdDev</b> | <b><math>k_{ba}</math> (<math>s^{-1}</math>)</b> | <b>StdDev</b> |
|-------------|--------------------------------------------------|---------------|--------------------------------------------------|---------------|
| <b>Y536</b> | 2.29E+00                                         | 1.00E-02      | 2.36E+00                                         | 1.30E-02      |
|             | 2.87E+00                                         | 6.00E-02      | 2.64E+00                                         | 4.00E-02      |
| <b>V532</b> | 2.23E+00                                         | 3.00E-02      | 2.43E+00                                         | 5.00E-02      |
|             | 1.69E+00                                         | 7.00E-02      | 1.97E+00                                         | 5.00E-02      |
| <b>G530</b> | 2.83E+00                                         | 5.00E-02      | 2.77E+00                                         | 6.00E-02      |
