# Supplementary material for: A gratuitous β-Lactamase inducer uncovers hidden active site dynamics of the Staphylococcus aureus BlaR1 sensor domain
Source: PubMed Central journal article supplement (PMC5957439; doi:10.1371/journal.pone.0197241), 2018-05-17
Supplement: pone.0197241.s008.pdf [file pone.0197241.s008.pdf]

**S3 Table. Reduced spectral density  $J_{\text{eff}}(0)$  values and dimensionless ratio.**

| Residue | CBAP    |         | Apo     |         | CBAP-Apo |         |
|---------|---------|---------|---------|---------|----------|---------|
|         | Jeff(0) | StdDev  | Jeff(0) | StdDev  | Ratio    | StdDev  |
| 334     | 2.16E+0 | 1.40E-2 | --      | --      | --       | --      |
| 335     | 2.72E+0 | 3.30E-2 | 2.99E+0 | 2.91E-3 | -5.72E-2 | 1.11E-2 |
| 336     | 3.56E+0 | 6.29E-2 | 3.70E+0 | 1.09E-1 | -8.16E-3 | 3.30E-2 |
| 337     | 4.87E+0 | 7.77E-2 | 4.77E+0 | 1.11E-2 | 5.18E-2  | 1.65E-2 |
| 338     | 6.80E+0 | 9.49E-2 | 7.31E+0 | 1.02E-1 | -3.79E-2 | 1.84E-2 |
| 339     | 7.57E+0 | 4.01E-1 | --      | --      | --       | --      |
| 340     | 8.74E+0 | 5.27E-1 | --      | --      | --       | --      |
| 343     | --      | --      | 6.50E+0 | 2.78E-1 | --       | --      |
| 346     | --      | --      | 7.52E+0 | 1.01E-1 | --       | --      |
| 347     | 6.19E+0 | 5.15E-2 | 6.60E+0 | 1.71E-2 | -2.97E-2 | 8.17E-3 |
| 348     | --      | --      | 7.21E+0 | 3.02E-2 | --       | --      |
| 349     | 6.70E+0 | 1.01E-1 | 6.82E+0 | 4.76E-2 | 1.40E-2  | 1.64E-2 |
| 350     | 6.86E+0 | 9.03E-2 | 6.70E+0 | 2.23E-1 | 5.57E-2  | 3.67E-2 |
| 353     | 1.06E+1 | 4.11E-1 | --      | --      | --       | --      |
| 355     | 8.24E+0 | 1.58E-1 | 7.78E+0 | 1.44E-1 | 9.13E-2  | 2.82E-2 |
| 356     | 7.48E+0 | 2.64E-2 | 7.99E+0 | 2.31E-1 | -3.20E-2 | 2.73E-2 |
| 357     | 7.03E+0 | 9.83E-2 | 6.89E+0 | 8.91E-1 | 5.28E-2  | 1.33E-1 |
| 359     | 7.38E+0 | 5.97E-2 | 7.81E+0 | 2.08E-1 | -2.36E-2 | 2.63E-2 |
| 360     | 6.00E+0 | 1.45E-1 | 6.48E+0 | 2.53E-2 | -4.15E-2 | 2.27E-2 |
| 360_2   | 6.37E+0 | 7.11E-2 | --      | --      | -1.65E-2 | 1.16E-2 |
| 361     | 6.05E+0 | 5.80E-2 | 6.44E+0 | 4.46E-2 | -2.91E-2 | 1.11E-2 |
| 362     | 7.20E+0 | 3.82E-1 | 6.18E+0 | 6.43E-1 | 1.98E-1  | 1.36E-1 |
| 362_2   | 8.25E+0 | 6.30E-1 | --      | --      | 3.35E-1  | 1.72E-1 |
| 363     | 8.61E+0 | 1.84E-1 | 8.80E+0 | 6.75E-1 | 1.07E-2  | 7.80E-2 |
| 364     | --      | --      | 9.69E+0 | 6.67E-2 | --       | --      |
| 365     | --      | --      | 9.06E+0 | 7.13E-2 | --       | --      |
| 366     | 6.81E+0 | 4.88E-2 | 8.98E+0 | 6.15E-1 | -2.10E-1 | 5.22E-2 |
| 367     | 7.33E+0 | 1.61E-1 | 1.00E+1 | 2.13E+0 | -2.34E-1 | 1.57E-1 |
| 368     | 7.17E+0 | 1.28E-1 | 7.20E+0 | 1.59E-1 | 2.83E-2  | 2.83E-2 |
| 369     | 6.97E+0 | 1.71E-1 | 7.34E+0 | 1.27E-2 | -1.85E-2 | 2.33E-2 |
| 370     | 7.41E+0 | 2.35E-1 | 7.57E+0 | 2.92E-1 | 1.07E-2  | 4.88E-2 |
| 371     | 7.53E+0 | 1.16E-1 | 7.13E+0 | 1.88E-1 | 8.85E-2  | 3.23E-2 |
| 372     | 8.21E+0 | 2.30E-1 | 6.59E+0 | 3.34E-1 | 2.79E-1  | 7.22E-2 |
| 373     | 7.37E+0 | 1.57E-1 | 7.43E+0 | 1.83E-2 | 2.32E-2  | 2.12E-2 |
| 374     | 6.90E+0 | 3.66E-1 | 1.06E+1 | 1.71E+0 | -3.14E-1 | 1.12E-1 |
| 375     | 7.00E+0 | 6.17E-2 | 7.06E+0 | 1.07E-1 | 2.36E-2  | 1.74E-2 |
| 376     | 7.48E+0 | 1.11E-1 | 8.86E+0 | 3.85E-1 | -1.24E-1 | 3.87E-2 |
| 377     | 6.97E+0 | 6.77E-2 | 7.40E+0 | 1.33E-1 | -2.55E-2 | 1.92E-2 |
| 378     | 7.21E+0 | 6.83E-2 | 7.23E+0 | 1.37E-1 | 2.93E-2  | 2.12E-2 |
| 379     | 8.04E+0 | 1.65E-2 | --      | --      | --       | --      |
| 380     | 8.08E+0 | 2.87E-1 | 8.59E+0 | 2.25E-1 | -2.66E-2 | 4.15E-2 |
| 381     | 8.53E+0 | 1.37E-1 | 8.37E+0 | 5.06E-1 | 5.19E-2  | 6.38E-2 |
| 382     | 9.24E+0 | 2.52E-1 | 9.15E+0 | 1.71E-1 | 4.20E-2  | 3.34E-2 |

|       |         |         |         |         |          |         |
|-------|---------|---------|---------|---------|----------|---------|
| 383   | 7.94E+0 | 1.04E-1 | 7.98E+0 | 4.19E-2 | 2.82E-2  | 1.41E-2 |
| 384   | 7.78E+0 | 4.33E-2 | 8.10E+0 | 3.85E-2 | -6.95E-3 | 7.03E-3 |
| 385   | 7.42E+0 | 2.55E-1 | 7.90E+0 | 9.81E-3 | -2.88E-2 | 3.22E-2 |
| 386   | 7.71E+0 | 3.83E-1 | --      | --      | --       | --      |
| 386_2 | 7.61E+0 | 4.35E-1 | --      | --      | --       | --      |
| 390   | --      | --      | 7.49E+0 | 2.59E-1 | --       | --      |
| 391   | --      | --      | 8.29E+0 | 1.37E+0 | --       | --      |
| 395   | --      | --      | 8.65E+0 | 1.58E+0 | --       | --      |
| 396   | --      | --      | 1.27E+1 | 1.87E+0 | --       | --      |
| 399   | 7.64E+0 | 1.78E-1 | 7.57E+0 | 9.31E-1 | 4.12E-2  | 1.26E-1 |
| 400   | 7.61E+0 | 2.53E-1 | --      | --      | --       | --      |
| 401   | 7.07E+0 | 9.65E-2 | 7.57E+0 | 3.91E-1 | -3.44E-2 | 4.99E-2 |
| 402   | 5.95E+0 | 1.20E-1 | 6.46E+0 | 1.42E-1 | -4.59E-2 | 2.75E-2 |
| 403   | 7.34E+0 | 1.05E-1 | 7.23E+0 | 1.84E-1 | 4.85E-2  | 2.97E-2 |
| 404   | 7.62E+0 | 8.77E-2 | --      | --      | --       | --      |
| 405   | 8.67E+0 | 9.48E-2 | --      | --      | --       | --      |
| 406   | 8.18E+0 | 3.69E-2 | --      | --      | --       | --      |
| 407   | 6.57E+0 | 4.62E-2 | --      | --      | --       | --      |
| 408   | 5.91E+0 | 9.52E-2 | --      | --      | --       | --      |
| 409   | 5.67E+0 | 1.94E-2 | --      | --      | --       | --      |
| 410   | 7.84E+0 | 3.36E-1 | --      | --      | --       | --      |
| 411   | 7.37E+0 | 1.05E-1 | 9.88E+0 | 6.77E-1 | -2.22E-1 | 5.22E-2 |
| 412   | 6.82E+0 | 1.03E-1 | --      | --      | --       | --      |
| 413   | 7.09E+0 | 2.02E-1 | 8.03E+0 | 1.17E-1 | -8.49E-2 | 2.83E-2 |
| 414   | 7.08E+0 | 9.00E-2 | --      | --      | --       | --      |
| 415   | 9.13E+0 | 4.28E-1 | --      | --      | --       | --      |
| 422   | --      | --      | 3.75E+0 | 4.36E-1 | --       | --      |
| 424   | 7.65E+0 | 1.96E-1 | --      | --      | --       | --      |
| 424_2 | 7.51E+0 | 1.06E-1 | --      | --      | --       | --      |
| 425   | 7.81E+0 | 1.88E-1 | 7.00E+0 | 3.04E-1 | 1.48E-1  | 5.54E-2 |
| 426   | 1.01E+1 | 1.11E-1 | --      | --      | --       | --      |
| 426_2 | 1.11E+1 | 1.09E+0 | --      | --      | --       | --      |
| 427   | 6.67E+0 | 7.71E-2 | --      | --      | --       | --      |
| 428   | 8.17E+0 | 3.65E-1 | --      | --      | --       | --      |
| 431   | 6.72E+0 | 1.45E-1 | --      | --      | --       | --      |
| 432   | 7.40E+0 | 3.37E-2 | --      | --      | --       | --      |
| 434   | 7.61E+0 | 1.30E-1 | 9.16E+0 | 1.41E-1 | -1.38E-1 | 1.90E-2 |
| 434_2 | 7.57E+0 | 2.52E-1 | --      | --      | -1.74E-1 | 3.03E-2 |
| 435   | 7.27E+0 | 1.63E-1 | --      | --      | --       | --      |
| 436   | 6.68E+0 | 1.90E-2 | --      | --      | --       | --      |
| 437   | 7.71E+0 | 1.28E-1 | --      | --      | --       | --      |
| 438   | 7.13E+0 | 1.50E-1 | --      | --      | --       | --      |
| 438_2 | 7.79E+0 | 2.01E-1 | --      | --      | --       | --      |
| 445   | 7.79E+0 | 1.11E-1 | 8.88E+0 | 6.35E-1 | -9.06E-2 | 6.40E-2 |
| 445_2 | 7.55E+0 | 2.21E-1 | --      | --      | -1.49E-1 | 6.57E-2 |
| 446   | 7.01E+0 | 1.24E-1 | 7.63E+0 | 2.16E-1 | -4.92E-2 | 3.07E-2 |
| 447   | 8.43E+0 | 2.09E-1 | 7.75E+0 | 2.53E-1 | 1.20E-1  | 4.46E-2 |
| 448   | 7.40E+0 | 7.68E-2 | 7.09E+0 | 2.42E-1 | 7.60E-2  | 3.72E-2 |

|       |         |         |         |         |          |         |
|-------|---------|---------|---------|---------|----------|---------|
| 449   | 6.56E+0 | 2.35E-1 | 6.94E+0 | 4.14E-2 | -2.24E-2 | 3.43E-2 |
| 451   | 7.18E+0 | 7.87E-2 | 7.20E+0 | 4.11E-2 | 2.89E-2  | 1.23E-2 |
| 452   | 7.40E+0 | 1.57E-2 | --      | --      | --       | --      |
| 453   | --      | --      | 7.33E+0 | 1.03E-2 | --       | --      |
| 454   | 8.33E+0 | 1.40E-1 | 8.19E+0 | 4.13E-1 | 4.89E-2  | 5.41E-2 |
| 456   | 7.60E+0 | 1.24E-1 | 7.78E+0 | 2.81E-1 | 9.57E-3  | 3.87E-2 |
| 457   | 7.74E+0 | 6.18E-2 | 8.08E+0 | 9.71E-1 | -9.53E-3 | 1.16E-1 |
| 458   | 7.81E+0 | 2.21E-1 | 8.41E+0 | 9.57E-1 | -3.93E-2 | 1.09E-1 |
| 459   | 8.25E+0 | 1.35E-1 | --      | --      | --       | --      |
| 461   | 7.60E+0 | 2.66E-1 | 7.72E+0 | 2.16E-1 | 1.55E-2  | 4.40E-2 |
| 462   | 7.26E+0 | 1.98E-1 | --      | --      | --       | --      |
| 463   | 7.50E+0 | 2.43E-1 | 7.05E+0 | 1.72E-2 | 9.55E-2  | 3.45E-2 |
| 464   | 7.32E+0 | 1.47E-1 | 6.89E+0 | 1.04E-1 | 9.42E-2  | 2.67E-2 |
| 465   | 7.26E+0 | 7.73E-2 | 8.36E+0 | 1.48E-1 | -9.89E-2 | 1.79E-2 |
| 466   | 7.12E+0 | 1.64E-1 | 7.60E+0 | 6.79E-2 | -3.13E-2 | 2.32E-2 |
| 467   | 7.94E+0 | 1.22E-1 | --      | --      | --       | --      |
| 468   | 7.13E+0 | 1.03E-1 | 6.99E+0 | 6.95E-2 | 5.23E-2  | 1.79E-2 |
| 468_2 | 7.92E+0 | 1.99E-1 | --      | --      | 1.33E-1  | 3.06E-2 |
| 469   | 7.25E+0 | 1.09E-1 | 7.65E+0 | 1.74E-2 | -2.01E-2 | 1.44E-2 |
| 470   | 1.01E+1 | 5.77E-1 | 1.06E+1 | 3.94E-1 | -1.70E-2 | 6.49E-2 |
| 471   | 8.97E+0 | 3.74E-1 | 8.35E+0 | 1.27E-1 | 1.06E-1  | 4.77E-2 |
| 472   | 8.27E+0 | 2.11E-1 | --      | --      | --       | --      |
| 475   | 9.56E+0 | 1.94E-1 | 8.97E+0 | 4.44E-2 | 9.88E-2  | 2.22E-2 |
| 475_2 | 9.69E+0 | 7.31E-1 | --      | --      | 8.05E-2  | 8.17E-2 |
| 476   | 9.44E+0 | 8.30E-1 | 8.77E+0 | 1.92E-2 | 1.07E-1  | 9.46E-2 |
| 476_2 | 9.07E+0 | 4.79E-1 | --      | --      | 3.34E-1  | 5.46E-2 |
| 477   | --      | --      | 7.84E+0 | 1.73E-1 | --       | --      |
| 478   | 8.19E+0 | 7.19E-1 | 7.86E+0 | 2.12E-1 | 7.43E-2  | 9.56E-2 |
| 479   | 7.70E+0 | 9.19E-1 | 8.59E+0 | 3.30E-1 | -7.20E-2 | 1.12E-1 |
| 480   | 8.24E+0 | 1.20E-1 | 8.37E+0 | 4.22E-1 | 1.58E-2  | 5.16E-2 |
| 481   | 6.13E+0 | 2.04E-1 | 6.52E+0 | 2.65E-1 | -2.82E-2 | 4.93E-2 |
| 482   | --      | --      | 6.15E+0 | 1.34E+0 | --       | --      |
| 482_2 | 7.17E+0 | 5.35E-1 | --      | --      | --       | --      |
| 483   | 9.77E+0 | 1.44E+0 | 1.33E+1 | 3.07E+0 | -2.35E-1 | 2.00E-1 |
| 484   | 7.98E+0 | 1.16E-1 | 7.75E+0 | 7.42E-2 | 6.07E-2  | 1.79E-2 |
| 485   | 9.06E+0 | 7.53E-1 | 1.07E+1 | 1.36E+0 | -1.19E-1 | 1.29E-1 |
| 486   | 8.23E+0 | 2.53E-1 | 8.89E+0 | 1.80E-1 | -4.21E-2 | 3.41E-2 |
| 487   | 7.75E+0 | 1.65E-1 | 8.59E+0 | 1.63E+0 | -6.53E-2 | 1.72E-1 |
| 488   | 7.86E+0 | 4.12E-1 | --      | --      | --       | --      |
| 489   | 7.91E+0 | 2.17E-1 | 7.12E+0 | 1.09E+0 | 1.42E-1  | 1.72E-1 |
| 490   | 6.69E+0 | 2.02E-1 | 9.66E+0 | 1.01E+0 | -2.75E-1 | 7.57E-2 |
| 491   | 9.06E+0 | 3.54E-1 | 8.18E+0 | 4.08E-2 | 1.40E-1  | 4.36E-2 |
| 492   | --      | --      | 7.24E+0 | 2.21E-2 | --       | --      |
| 493   | --      | --      | 8.88E+0 | 2.05E-1 | --       | --      |
| 494   | --      | --      | 1.06E+1 | 1.07E-1 | --       | --      |
| 495   | --      | --      | 7.31E+0 | 6.25E-1 | --       | --      |
| 496   | 7.32E+0 | 1.32E-1 | 7.52E+0 | 7.95E-2 | 5.07E-3  | 2.04E-2 |
| 497   | 7.64E+0 | 3.09E-2 | --      | --      | --       | --      |

|       |         |         |         |         |          |         |
|-------|---------|---------|---------|---------|----------|---------|
| 502   | --      | --      | 7.31E+0 | 3.51E-1 | --       | --      |
| 504   | --      | --      | 7.94E+0 | 7.82E-1 | --       | --      |
| 505   | --      | --      | 7.94E+0 | 4.09E-1 | --       | --      |
| 506   | 6.97E+0 | 2.04E-2 | 7.06E+0 | 1.01E-1 | 1.88E-2  | 1.44E-2 |
| 507   | 7.31E+0 | 1.11E-1 | 7.51E+0 | 1.56E-1 | 5.18E-3  | 2.51E-2 |
| 508   | 7.00E+0 | 1.62E-1 | 7.45E+0 | 3.98E-1 | -2.91E-2 | 5.46E-2 |
| 509   | 7.49E+0 | 5.74E-2 | 7.25E+0 | 3.55E-2 | 6.49E-2  | 9.39E-3 |
| 510   | 7.74E+0 | 9.27E-2 | 7.45E+0 | 1.35E-1 | 7.16E-2  | 2.26E-2 |
| 511   | --      | --      | 6.45E+0 | 5.20E-2 | --       | --      |
| 512   | --      | --      | 7.37E+0 | 2.38E-1 | --       | --      |
| 513   | 7.07E+0 | 1.99E-1 | 7.68E+0 | 8.08E-1 | -4.80E-2 | 1.00E-1 |
| 514   | 7.51E+0 | 1.08E-1 | 7.48E+0 | 1.62E-1 | 3.56E-2  | 2.60E-2 |
| 515   | 7.41E+0 | 3.68E-1 | 6.99E+0 | 2.19E-1 | 9.28E-2  | 6.22E-2 |
| 516   | --      | --      | 6.49E+0 | 3.92E-1 | --       | --      |
| 517   | 6.28E+0 | 5.53E-2 | 6.72E+0 | 1.01E-1 | -3.37E-2 | 1.63E-2 |
| 518   | --      | --      | 7.63E+0 | 2.68E-1 | --       | --      |
| 519   | 6.42E+0 | 9.55E-2 | 7.06E+0 | 2.14E-2 | -5.79E-2 | 1.38E-2 |
| 520   | 6.66E+0 | 7.77E-2 | 7.08E+0 | 5.06E-1 | -2.74E-2 | 6.81E-2 |
| 521   | 7.12E+0 | 1.16E-1 | 6.27E+0 | 2.15E-1 | 1.68E-1  | 4.32E-2 |
| 522   | 6.71E+0 | 2.64E-2 | 6.90E+0 | 1.23E-1 | 4.24E-3  | 1.78E-2 |
| 523   | 6.60E+0 | 1.07E-1 | 6.60E+0 | 3.07E-1 | 3.30E-2  | 4.93E-2 |
| 524   | 6.84E+0 | 2.13E-1 | 6.74E+0 | 3.39E-1 | 4.71E-2  | 6.00E-2 |
| 525   | 6.84E+0 | 1.76E-1 | 5.31E+0 | 3.23E-1 | 3.19E-1  | 8.49E-2 |
| 526   | 7.11E+0 | 6.28E-1 | 8.89E+0 | 6.65E-1 | -1.69E-1 | 9.25E-2 |
| 527   | 7.19E+0 | 1.27E-1 | 7.99E+0 | 2.71E-1 | -6.86E-2 | 3.44E-2 |
| 528   | 9.23E+0 | 4.33E-1 | 8.29E+0 | 4.85E-2 | 1.45E-1  | 5.26E-2 |
| 528_2 | 8.16E+0 | 2.91E-1 | --      | --      | -1.58E-2 | 3.55E-2 |
| 529   | 7.89E+0 | 2.29E-1 | --      | --      | --       | --      |
| 529_2 | 7.80E+0 | 7.89E-2 | --      | --      | --       | --      |
| 530   | 8.00E+0 | 4.85E-1 | --      | --      | --       | --      |
| 531   | --      | --      | 8.10E+0 | 1.84E-1 | --       | --      |
| 532   | 7.36E+0 | 3.54E-1 | 6.41E+0 | 1.37E-2 | 1.80E-1  | 5.53E-2 |
| 532_2 | 6.42E+0 | 9.31E-2 | --      | --      | 1.72E-3  | 1.47E-2 |
| 533   | 8.39E+0 | 6.80E-2 | 1.01E+1 | 1.26E+0 | -1.38E-1 | 1.04E-1 |
| 533_2 | 7.07E+0 | 5.38E-1 | --      | --      | -3.00E-1 | 1.03E-1 |
| 534   | 5.61E+0 | 2.70E-1 | 7.71E+0 | 3.11E-1 | -2.41E-1 | 4.57E-2 |
| 534_2 | 5.88E+0 | 1.77E-1 | --      | --      | -2.37E-1 | 3.84E-2 |
| 535   | 7.04E+0 | 9.63E-2 | 6.78E+0 | 6.33E-2 | 6.92E-2  | 1.72E-2 |
| 535_2 | 6.27E+0 | 1.61E-1 | --      | --      | -7.59E-2 | 2.53E-2 |
| 536   | 6.82E+0 | 1.04E-1 | --      | --      | --       | --      |
| 536_2 | 6.57E+0 | 2.31E-1 | --      | --      | --       | --      |
| 537   | 7.95E+0 | 2.38E-1 | 7.64E+0 | 6.55E-1 | 7.35E-2  | 9.46E-2 |
| 538   | --      | --      | 8.12E+0 | 3.68E-1 | --       | --      |
| 539   | --      | --      | 1.11E+1 | 1.99E-1 | --       | --      |
| 540   | --      | --      | 9.27E+0 | 5.52E-1 | --       | --      |
| 542   | --      | --      | 7.71E+0 | 4.28E-1 | --       | --      |
| 545   | --      | --      | 7.87E+0 | 3.72E-1 | --       | --      |
| 547   | 6.96E+0 | 1.19E-1 | 7.25E+0 | 2.98E-1 | -7.68E-3 | 4.28E-2 |

|       |         |         |         |         |          |         |
|-------|---------|---------|---------|---------|----------|---------|
| 548   | 7.21E+0 | 9.95E-2 | 7.53E+0 | 9.86E-2 | -1.06E-2 | 1.82E-2 |
| 548_2 | 7.39E+0 | 1.67E-1 | --      | --      | -1.86E-2 | 2.22E-1 |
| 549   | --      | --      | 7.08E+0 | 4.45E-1 | --       | --      |
| 550   | 6.95E+0 | 1.37E-1 | 7.14E+0 | 2.63E-1 | 4.35E-3  | 4.07E-2 |
| 551   | 6.55E+0 | 5.05E-2 | 6.76E+0 | 1.41E-1 | 2.80E-4  | 2.16E-2 |
| 552   | --      | --      | 6.64E+0 | 2.37E+0 | --       | --      |
| 555   | 7.45E+0 | 1.61E-1 | --      | --      | --       | --      |
| 556   | 7.71E+0 | 4.74E-1 | 8.05E+0 | 2.11E+0 | -1.03E-2 | 2.57E-1 |
| 556_2 | 7.37E+0 | 9.24E-1 | --      | --      | -8.49E-2 | 2.65E-1 |
| 557   | 8.78E+0 | 3.98E-1 | 1.03E+1 | 7.70E-2 | -1.19E-1 | 3.90E-2 |
| 558   | 7.66E+0 | 1.41E-1 | 8.39E+0 | 4.71E-1 | -5.49E-2 | 5.39E-2 |
| 559   | 8.94E+0 | 4.56E-1 | 9.40E+0 | 1.06E-1 | -1.74E-2 | 4.97E-2 |
| 559_2 | 8.04E+0 | 2.81E-1 | --      | --      | -1.45E-1 | 3.14E-2 |
| 560   | 7.91E+0 | 6.68E-2 | --      | --      | --       | --      |
| 561   | 5.81E+0 | 7.79E-2 | 6.55E+0 | 1.61E-1 | -8.08E-2 | 2.49E-2 |
| 562   | 6.80E+0 | 1.32E-1 | 9.01E+0 | 1.23E-2 | -2.13E-1 | 1.47E-2 |
| 565   | 7.16E+0 | 2.02E-1 | 7.66E+0 | 3.80E-1 | -3.29E-2 | 5.34E-2 |
| 565_2 | 7.57E+0 | 7.31E-1 | --      | --      | -1.14E-2 | 1.07E-1 |
| 566   | 7.34E+0 | 1.91E-1 | 8.30E+0 | 2.02E-2 | -8.34E-2 | 2.31E-2 |
| 567   | 8.73E+0 | 4.27E-1 | 6.99E+0 | 1.08E-1 | 2.82E-1  | 6.40E-2 |
| 568   | 5.72E+0 | 3.34E-1 | 6.95E+0 | 1.52E-1 | -1.44E-1 | 5.14E-2 |
| 569   | 7.90E+0 | 3.86E-1 | 8.19E+0 | 2.18E-2 | -2.62E-3 | 4.72E-2 |
| 569_2 | 7.95E+0 | 2.44E-1 | --      | --      | -2.85E-2 | 3.00E-2 |
| 570   | --      | --      | 7.59E+0 | 2.03E-1 | --       | --      |
| 571   | --      | --      | 7.98E+0 | 5.65E-2 | --       | --      |
| 572   | --      | --      | 6.78E+0 | 7.35E-2 | --       | --      |
| 573   | --      | --      | 7.55E+0 | 1.94E-2 | --       | --      |
| 577   | 7.05E+0 | 4.40E-2 | 7.43E+0 | 5.04E-3 | -1.96E-2 | 5.95E-3 |
| 578   | 7.16E+0 | 8.65E-2 | 7.12E+0 | 2.19E-1 | 3.88E-2  | 3.33E-2 |
| 579   | --      | --      | 6.71E+0 | 1.99E-1 | --       | --      |
| 580   | 7.43E+0 | 1.70E-1 | 7.42E+0 | 9.43E-1 | 3.33E-2  | 1.29E-1 |
| 583   | 4.84E+0 | 8.39E-2 | 5.65E+0 | 1.19E-1 | -1.12E-1 | 2.34E-2 |
| 584   | 3.40E+0 | 1.35E-1 | 3.39E+0 | 4.42E-2 | 3.38E-2  | 4.19E-2 |
| 585   | --      | --      | 1.95E+0 | 5.03E-1 | --       | --      |
